# Supplementary material
Source: publisher figshare collection journal article supplement (https://geolsoc.figshare.com/ndownloader/files/5421941)
Supplement: Supplementary file 1 [file 5421941]

Run_ID	Laser (W)	40Ar	40Ar error	39Ar	39Ar error	38Ar	38Ar error	37Ar	37Ar error	36Ar	36Ar error	40Ar* (%)	age	± error w/o J
HFG09-1 D=0.9897±0.000262 Da-1 J= 0.001745±0.0000044
13666-01	6	2.81E-01	2.50E-04	3.86E-03	7.24E-06	1.08E-04	4.54E-06	9.64E-03	1.37E-04	2.36E-04	3.32E-06	75.44	165.5	0.81
13666-02	6	2.63E-01	2.16E-04	4.22E-03	7.06E-06	6.76E-05	4.54E-06	5.95E-03	1.12E-04	9.86E-05	2.92E-06	89.10	166.9	0.66
13666-03	6	2.30E-01	2.16E-04	3.88E-03	7.70E-06	5.87E-05	4.54E-06	9.09E-03	1.28E-04	4.57E-05	3.04E-06	94.45	168.3	0.75
13666-04	6	3.23E-01	2.86E-04	4.02E-03	7.15E-06	1.30E-04	5.23E-06	8.26E-03	1.26E-04	3.67E-04	3.08E-06	66.57	161.0	0.74
13666-05	6	1.53E-01	1.56E-04	2.19E-03	9.77E-06	4.89E-05	3.90E-06	4.56E-03	1.08E-04	1.12E-04	2.94E-06	78.62	166.0	1.35
13666-06	6	9.69E-02	1.37E-04	1.58E-03	5.65E-06	2.64E-05	4.29E-06	3.42E-03	1.04E-04	2.72E-05	2.86E-06	92.01	169.2	1.65
13666-07	6	1.32E-01	1.41E-04	2.09E-03	6.35E-06	3.90E-05	4.05E-06	4.45E-03	1.26E-04	6.12E-05	3.01E-06	86.56	164.5	1.33
13666-08	6	3.31E-01	2.68E-04	4.29E-03	9.11E-06	1.28E-04	4.80E-06	7.11E-03	1.15E-04	3.49E-04	3.09E-06	68.98	160.4	0.72
13666-09	6	6.22E-02	1.30E-04	1.06E-03	4.75E-06	1.58E-05	4.71E-06	3.04E-03	1.05E-04	1.03E-05	2.85E-06	95.52	168.5	2.41
13666-10	6	2.82E-01	2.77E-04	3.70E-03	1.14E-05	1.12E-04	4.29E-06	9.01E-03	1.38E-04	2.82E-04	3.28E-06	70.69	161.9	0.92
13666-11	7	1.94E-01	4.07E-04	3.26E-03	1.12E-05	6.69E-05	4.64E-06	8.35E-03	1.31E-04	5.04E-05	2.38E-06	92.70	166.3	0.89
13666-12	7	2.57E-01	4.15E-04	3.36E-03	1.12E-05	1.02E-04	4.79E-06	5.23E-03	1.28E-04	2.60E-04	2.32E-06	70.29	161.9	0.86
13666-13	7	9.87E-02	3.71E-04	1.65E-03	8.18E-06	2.29E-05	4.15E-06	3.64E-03	1.34E-04	2.03E-05	2.27E-06	94.22	170.0	1.54
13666-14	7	1.27E-01	3.73E-04	2.13E-03	9.93E-06	3.87E-05	4.63E-06	4.38E-03	1.40E-04	3.65E-05	2.13E-06	91.78	164.2	1.21
13666-15	7	1.58E-01	3.82E-04	2.11E-03	1.02E-05	5.68E-05	5.01E-06	4.64E-03	1.37E-04	1.46E-04	2.26E-06	72.94	164.8	1.29
13666-16	7	1.38E-01	3.78E-04	1.63E-03	4.87E-06	5.53E-05	4.48E-06	3.25E-03	1.31E-04	1.71E-04	2.26E-06	63.54	161.4	1.43
13666-17	7	2.70E-01	4.37E-04	4.46E-03	1.42E-05	8.18E-05	4.48E-06	7.71E-03	1.56E-04	1.02E-04	2.52E-06	89.12	162.7	0.74
13666-18	7	8.73E-02	3.70E-04	1.44E-03	4.87E-06	1.68E-05	5.49E-06	3.07E-03	1.29E-04	1.82E-05	2.26E-06	94.12	171.7	1.60
13666-19	7	1.92E-01	3.99E-04	3.00E-03	1.22E-05	6.21E-05	4.78E-06	3.91E-03	1.32E-04	1.05E-04	2.17E-06	84.04	162.2	0.95
13666-20	7	3.07E-01	4.50E-04	3.64E-03	6.26E-06	1.32E-04	4.56E-06	8.38E-03	1.66E-04	3.87E-04	2.47E-06	63.03	160.4	0.74
13666-21	7	9.54E-02	3.69E-04	1.56E-03	4.87E-06	2.03E-05	5.17E-06	3.93E-03	1.29E-04	2.14E-05	2.13E-06	93.71	172.7	1.42
13666-22	7	1.07E-01	3.75E-04	1.80E-03	4.78E-06	2.94E-05	5.09E-06	4.27E-03	1.47E-04	2.41E-05	2.27E-06	93.70	168.1	1.29
13666-24	7	1.95E-01	2.18E-04	2.66E-03	6.62E-06	7.51E-05	3.00E-06	5.83E-03	1.06E-03	1.81E-04	2.40E-06	72.84	160.9	1.33
13666-26	7	1.19E-01	1.49E-04	1.94E-03	1.33E-05	4.22E-05	2.64E-06	5.03E-03	7.07E-04	4.83E-05	2.90E-06	88.41	163.7	1.76
13666-28	7	1.62E-01	2.59E-04	2.37E-03	1.12E-05	5.74E-05	3.43E-06	5.43E-03	8.79E-04	1.26E-04	3.05E-06	77.20	158.7	1.59
13666-29	7	1.77E-01	3.09E-04	2.88E-03	1.62E-05	6.18E-05	3.29E-06	6.47E-03	7.04E-04	6.70E-05	3.10E-06	89.08	164.4	1.42
13666-30	7	6.34E-01	4.64E-04	1.02E-02	1.22E-05	1.95E-04	4.19E-06	2.71E-02	1.25E-03	2.41E-04	3.30E-06	89.11	166.4	0.71
HFG09-2 D=0.9897±0.000262 Da-1 J= 0.001748±0.0000032
13671-01	6	1.48E-01	1.42E-04	2.20E-03	7.70E-06	3.59E-05	3.89E-06	4.56E-03	1.05E-04	9.16E-05	2.97E-06	82.01	166.6	1.28
13671-02	6	2.36E-01	2.42E-04	3.46E-03	1.04E-05	8.11E-05	3.74E-06	9.43E-03	8.24E-05	1.54E-04	3.13E-06	81.00	166.5	0.92
13671-03	6	2.03E-01	2.08E-04	3.03E-03	6.34E-06	7.24E-05	4.29E-06	5.99E-03	1.83E-04	1.28E-04	3.04E-06	81.59	165.0	0.94
13671-04	6	2.66E-01	2.08E-04	4.26E-03	1.33E-05	5.63E-05	8.18E-06	7.37E-03	9.95E-05	1.06E-04	3.04E-06	88.42	166.7	0.79
13671-05	6	1.88E-01	1.69E-04	3.08E-03	1.04E-05	4.70E-05	4.05E-06	7.33E-03	1.81E-04	6.89E-05	2.97E-06	89.51	165.0	0.98
13671-07	6	1.43E-01	1.42E-04	1.97E-03	5.47E-06	3.96E-05	3.59E-06	4.04E-03	1.12E-04	1.18E-04	3.08E-06	75.98	166.3	1.41
13671-08	6	2.89E-01	2.33E-04	3.91E-03	7.79E-06	9.77E-05	4.37E-06	8.27E-03	1.06E-04	2.54E-04	3.00E-06	74.29	165.7	0.75
13671-09	6	2.22E-01	2.00E-04	3.69E-03	1.33E-05	7.29E-05	5.05E-06	5.25E-03	2.11E-04	5.92E-05	2.86E-06	92.32	167.6	0.88
13671-10	6	1.51E-01	1.56E-04	2.16E-03	5.39E-06	4.78E-05	4.45E-06	3.26E-03	1.09E-04	1.16E-04	2.90E-06	77.55	163.9	1.23
13671-11	7	2.60E-01	4.36E-04	4.32E-03	1.42E-05	8.14E-05	4.09E-06	9.34E-03	1.51E-04	7.73E-05	2.26E-06	91.51	166.2	0.73
13671-12	7	2.91E-01	4.21E-04	4.29E-03	1.22E-05	9.11E-05	5.34E-06	1.20E-02	1.51E-04	1.86E-04	2.55E-06	81.43	166.4	0.73
13671-15	7	2.55E-01	4.18E-04	3.86E-03	1.22E-05	8.42E-05	5.87E-06	7.49E-03	1.40E-04	1.46E-04	2.49E-06	83.31	165.8	0.80
13671-16	7	3.86E-01	4.47E-04	6.67E-03	1.42E-05	9.74E-05	4.49E-06	1.28E-02	1.29E-04	6.51E-05	2.35E-06	95.29	166.2	0.49
13671-17	7	3.20E-01	4.56E-04	5.20E-03	8.01E-06	9.96E-05	3.78E-06	7.47E-03	1.35E-04	1.23E-04	2.32E-06	88.84	164.7	0.52
13671-18	7	3.44E-01	4.47E-04	5.87E-03	1.42E-05	8.17E-05	6.75E-06	1.05E-02	1.51E-04	7.88E-05	2.47E-06	93.49	165.3	0.56
13671-19	7	2.63E-01	4.31E-04	3.51E-03	6.77E-06	9.04E-05	4.96E-06	7.45E-03	1.30E-04	2.42E-04	2.48E-06	73.00	165.2	0.77
13671-20	7	3.57E-01	4.79E-04	5.71E-03	9.96E-06	1.16E-04	4.68E-06	1.14E-02	1.26E-04	1.62E-04	2.40E-06	86.91	164.1	0.51
13671-21	7	3.07E-01	4.41E-04	5.01E-03	7.06E-06	8.14E-05	5.44E-06	6.20E-03	1.46E-04	1.05E-04	2.47E-06	90.04	166.2	0.54
13671-22	7	2.21E-01	4.15E-04	3.52E-03	1.32E-05	6.16E-05	4.57E-06	6.66E-03	1.35E-04	8.95E-05	2.38E-06	88.27	166.8	0.88
13671-24	7	3.05E-01	3.31E-04	4.82E-03	1.02E-05	1.01E-04	3.04E-06	1.60E-02	6.75E-04	1.52E-04	4.00E-06	85.72	163.8	1.05
13671-31	7	1.29E-01	2.38E-04	2.18E-03	7.62E-06	4.66E-05	3.95E-06	6.59E-03	7.58E-04	2.95E-05	3.01E-06	93.66	167.1	1.43
13671-23A	0.1	3.30E-01	3.53E-04	5.25E-03	1.52E-05	1.03E-04	3.90E-06	5.65E-03	1.97E-04	1.57E-04	2.32E-06	86.05	163.0	0.61
13671-23B	0.3	5.51E-02	2.50E-04	9.99E-04	6.53E-06	1.14E-05	4.62E-06	2.00E-03	1.27E-04	-5.18E-06	2.21E-06	103.08	171.3	2.25
13671-23C	0.5	6.96E-02	2.50E-04	1.24E-03	4.62E-06	1.40E-05	4.45E-06	2.39E-03	1.34E-04	2.74E-06	2.20E-06	99.12	167.0	1.71
13671-23D	0.9	7.32E-02	2.52E-04	1.29E-03	4.12E-06	1.81E-05	4.37E-06	2.59E-03	2.11E-04	1.01E-05	2.26E-06	96.21	164.4	1.66
13671-23E	1.4	8.83E-02	2.52E-04	1.51E-03	4.80E-06	2.36E-05	4.05E-06	3.22E-03	1.91E-04	2.14E-05	2.26E-06	93.14	164.5	1.45
13671-23F	2.5	1.19E-01	2.53E-04	1.86E-03	4.89E-06	1.57E-05	6.77E-06	3.97E-03	1.37E-04	5.38E-05	2.24E-06	86.88	167.4	1.17
13671-23G	4.5	3.95E-01	3.66E-04	6.59E-03	1.52E-05	1.19E-04	3.38E-06	1.55E-02	1.72E-04	1.06E-04	2.45E-06	92.37	167.1	0.51
13671-23H	6	5.05E-02	2.49E-04	8.55E-04	3.80E-06	2.30E-06	3.66E-06	1.98E-03	1.20E-04	2.44E-06	2.28E-06	98.90	175.7	2.50
13671-23I	7	6.34E-03	2.48E-04	1.13E-04	2.62E-06	3.11E-06	3.66E-06	1.75E-05	1.91E-04	3.86E-06	2.23E-06	82.03	140.0	18.43
LQ9-2 D=0.9897±0.000262 Da-1 J= 0.001721±0.0000031
13663-01A	0.1	8.97E-01	2.77E-04	1.44E-02	2.02E-05	3.06E-04	4.96E-06	2.29E-03	9.15E-05	6.62E-04	3.49E-06	78.21	145.1	0.29
13663-01B	0.4	5.62E-01	2.51E-04	1.06E-02	1.04E-05	1.66E-04	4.62E-06	1.82E-03	1.01E-04	5.50E-05	3.00E-06	97.13	153.3	0.29
13663-01C	0.8	4.01E-01	2.42E-04	7.43E-03	1.73E-05	1.13E-04	6.12E-06	8.96E-04	9.72E-05	-1.24E-06	2.93E-06	100.11	160.5	0.49
13663-01D	1	3.73E-01	1.92E-04	6.94E-03	9.11E-06	8.77E-05	4.37E-06	6.49E-04	1.13E-04	-2.81E-06	2.85E-06	100.24	160.3	0.41
13663-01E	1.5	6.02E-01	2.51E-04	1.12E-02	1.93E-05	1.40E-04	4.37E-06	1.31E-03	9.04E-05	5.75E-06	2.87E-06	99.74	159.1	0.34
13663-01F	2	1.15E+00	2.96E-04	2.12E-02	1.43E-05	2.63E-04	8.76E-06	3.07E-03	1.66E-04	2.37E-05	2.94E-06	99.41	159.6	0.16
13663-01G	3	8.66E-01	2.51E-04	1.61E-02	3.12E-05	2.05E-04	5.14E-06	1.89E-03	1.10E-04	5.38E-06	2.97E-06	99.83	159.7	0.33
13663-01H	4	1.05E+00	3.05E-04	1.95E-02	2.72E-05	2.45E-04	5.86E-06	2.48E-03	1.27E-04	1.00E-05	2.88E-06	99.74	159.8	0.25
13663-01I	5	1.53E+00	3.99E-04	2.82E-02	1.83E-05	3.92E-04	6.41E-06	4.58E-03	1.14E-04	4.74E-05	2.91E-06	99.11	159.4	0.14
13663-01J	7	5.79E-01	2.35E-04	1.07E-02	1.93E-05	1.45E-04	6.41E-06	1.80E-03	8.95E-05	2.22E-05	2.98E-06	98.89	159.2	0.36
